# Supplementary material for: A locked immunometabolic switch underlies TREM2 R47H loss of function in human iPSC‐derived microglia
Source: PubMed Central journal article supplement (PMC7027848; doi:10.1096/fj.201902447r), 2019-12-23

# Supp.Fig.1

**A.**

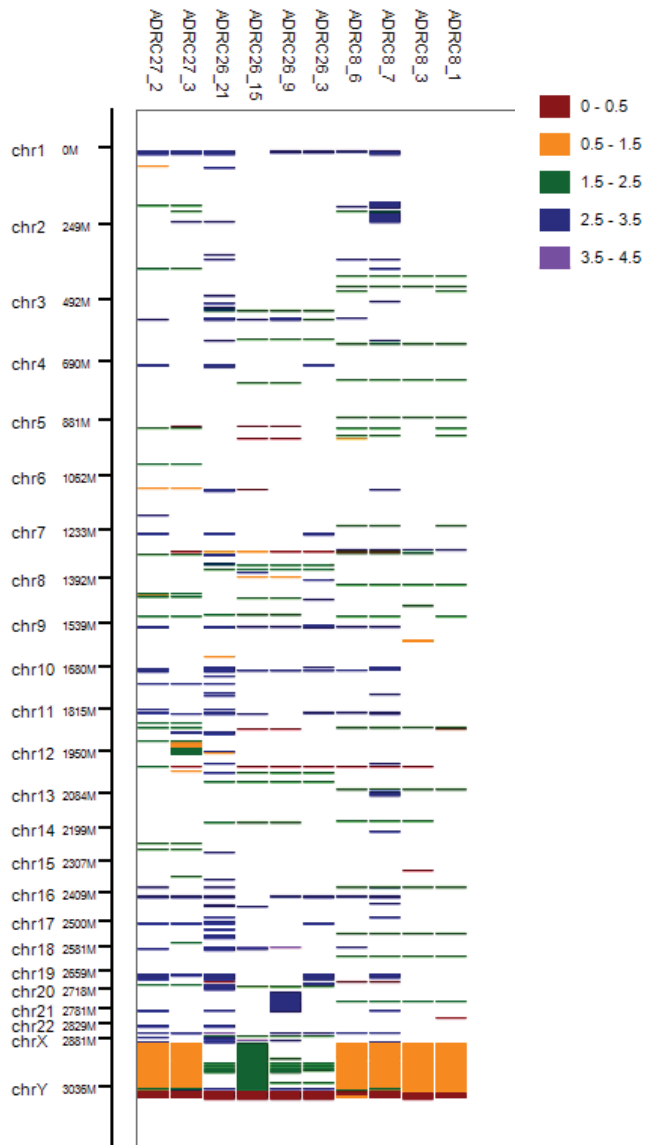

**B.**

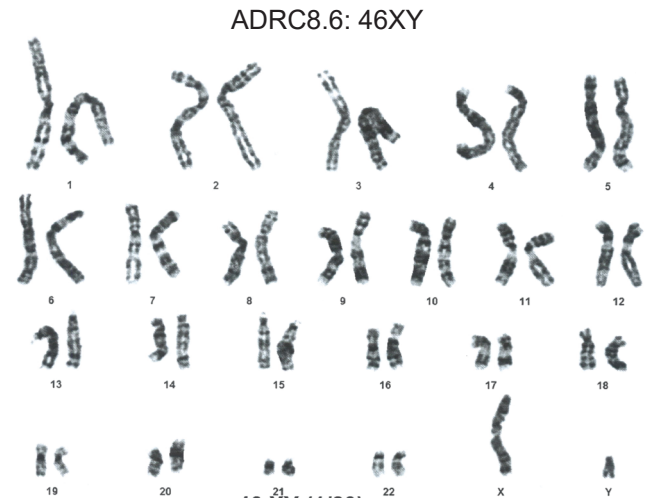

**C.**

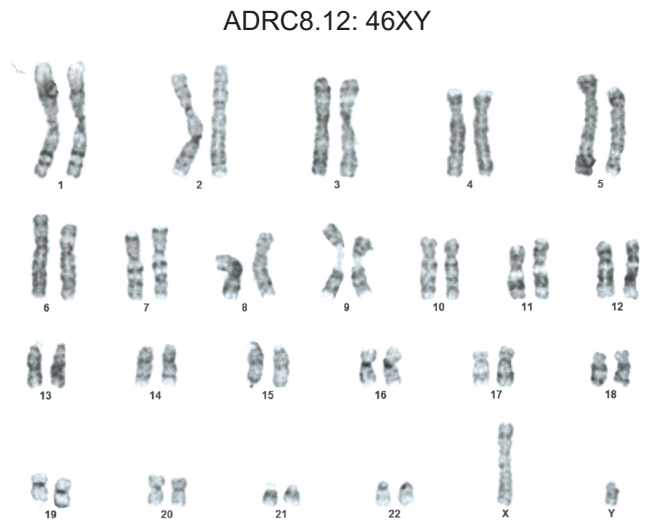

**D.**

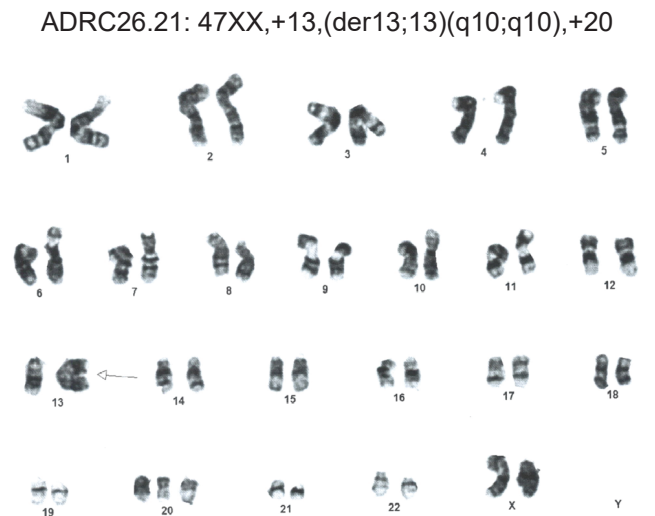

# Supp.Fig.2

## A.

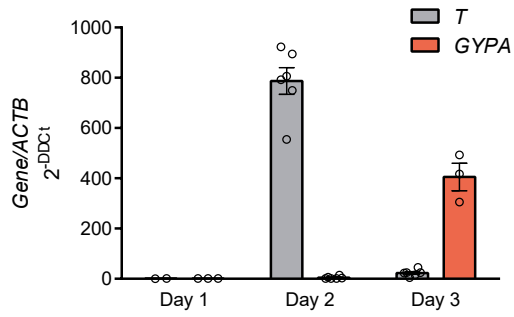

## B.

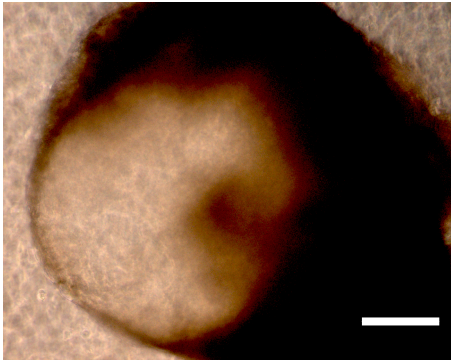

## C.

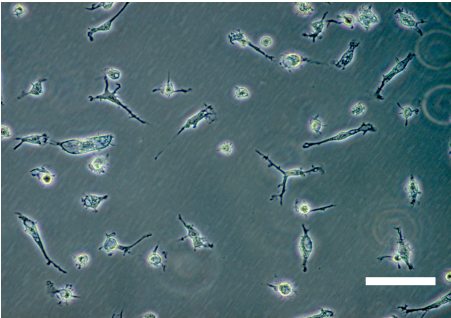

## D.

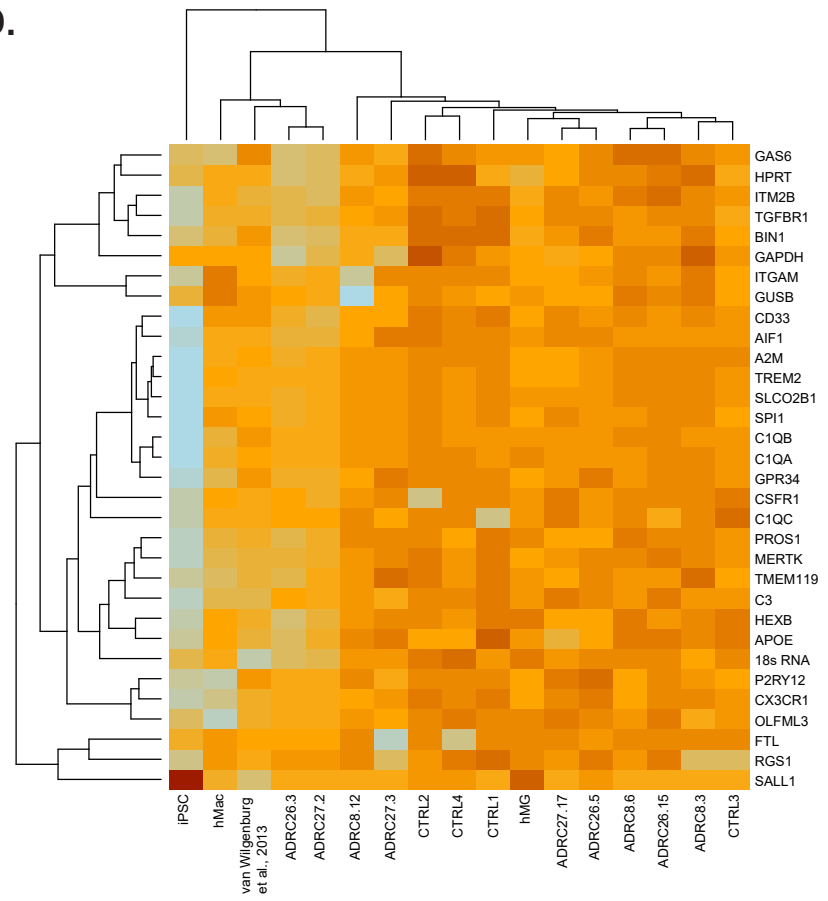

## E.

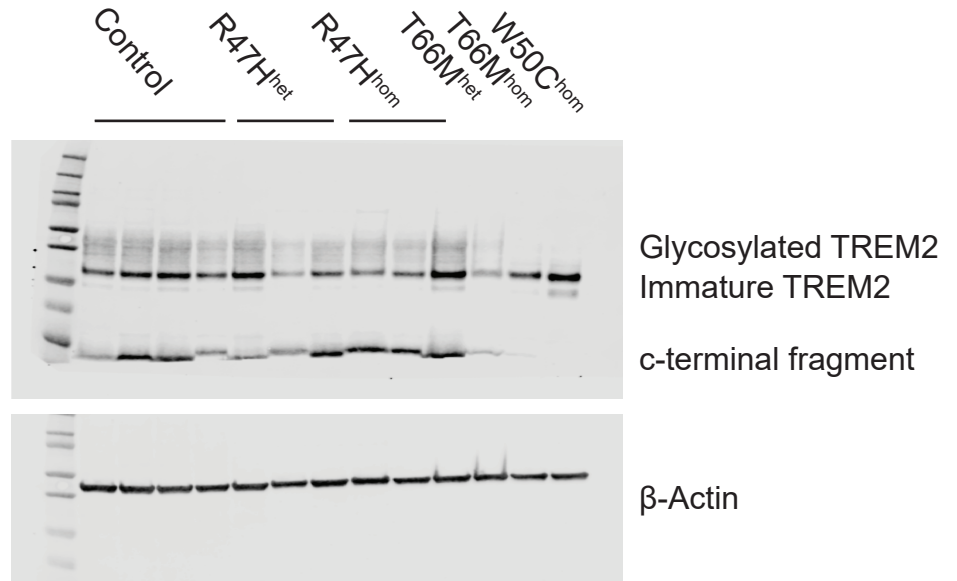

Supplement: FSB2-34-2436-s001.pdf [file FSB2-34-2436-s001.pdf]
